# Supplementary material for: Whole Genome Sequencing Links Mycobacterium bovis From Cattle, Cheese and Humans in Baja California, Mexico
Source: Front Vet Sci. 2021 Aug 3;8:674307. doi: 10.3389/fvets.2021.674307 (PMC8370811; doi:10.3389/fvets.2021.674307)
Supplement: Supplementary File 5 — Sequencing metrics for the genomes obtained in this study. [file Table_5.XLSX]

## Sheet: Sheet1
Supplementary File 6. Cheese samples obtained from the four municipalities of Baja California Mexico.
Sample ID	Store Code	Municipality	Type of cheese	Collection date	Date received	Date isolated	Type of cheese	dPCR	Culture
17-08206	S20	Tecate	FRESCO	2017-06-22	2017-07-13 10:02:00	2017-09-25 18:17:00	QUESO Fresco	Not Detected	No Isolation Made
17-08207	S37	Tecate	FRESCO	2017-06-22	2017-07-13 10:02:00	2017-09-14 15:41:00	QUESO Fresco	Detected	Mycobacterium bovis
17-08208	S37	Tecate	PANELA	2017-06-22	2017-07-13 10:02:00	2017-09-25 18:05:00	QUESO Panela	Not Detected	No Isolation Made
17-08209	S54	Ensenada	FRESCO	2017-06-22	2017-07-13 10:02:00	2017-09-25 18:14:00	QUESO Fresco	Not Detected	No Isolation Made
17-08210	S53	Tecate	FRESCO	2017-06-22	2017-07-13 10:02:00	2017-09-25 18:14:00	QUESO FRECO	Not Detected	No Isolation Made
17-08211	S55	Tijuana	FRESCO	2017-06-22	2017-07-13 10:02:00	2017-09-25 18:15:00	QUESO Fresco	Not Detected	No Isolation Made
17-08212	S45	Tecate	FRESCO	2017-06-22	2017-07-13 10:02:00	2017-09-25 18:14:00	QUESO Fresco	Not Detected	No Isolation Made
17-08213	S45	Tecate	PANELA	2017-06-22	2017-07-13 10:02:00	2017-09-25 18:15:00	QUESO Panela	Not Detected	No Isolation Made
17-08214	S82	Ensenada	FRESCO	2017-06-22	2017-07-13 10:02:00	2017-09-25 18:15:00	QUESO Fresco	Not Detected	No Isolation Made
17-08215	S82	Ensenada	PANELA	2017-06-22	2017-07-13 10:02:00	2017-09-25 18:15:00	QUESO Panela	Not Detected	No Isolation Made
17-08216	S42	Ensenada	PANELA	2017-06-23	2017-07-13 10:02:00	2017-09-25 18:15:00	QUESO Panela	Not Detected	No Isolation Made
17-08217	S42	Ensenada	FRESCO	2017-06-23	2017-07-13 10:02:00	2017-09-25 18:15:00	QUESO Fresco	Not Detected	No Isolation Made
17-08218	S41	Ensenada	FRESCO	2017-06-23	2017-07-13 10:02:00	2017-09-25 18:15:00	QUESO Fresco	Not Detected	No Isolation Made
17-08219	S29	Ensenada	FRESCO	2017-06-23	2017-07-13 10:02:00	2017-09-25 18:15:00	QUESO Fresco	Not Detected	No Isolation Made
17-08427	S67	Ensenada	FRESCO	2017-06-23	2017-07-13 10:02:00	2017-09-25 18:15:00	QUESO Fresco	Inhibited	No Isolation Made
17-08428	S68	Ensenada	FRESCO	2017-06-23	2017-07-13 10:02:00	2017-10-08 15:00:00	QUESO Fresco	Inhibited	No Isolation Made
17-08429	S68	Ensenada	PANELA	2017-06-23	2017-07-13 10:02:00	2017-10-08 14:49:00	QUESO Panela	Inhibited	No Isolation Made
17-08430	S65	Ensenada	FRESCO	2017-06-23	2017-07-13 10:02:00	2017-10-08 15:18:00	QUESO Fresco	Not Detected	Contaminated (overgrowth of non acid fast bacteria)
17-08431	S63	Ensenada	FRESCO	2017-06-23	2017-07-13 10:02:00	2017-10-08 15:18:00	QUESO Fresco	Inhibited	No Isolation Made
17-08432	S23	Ensenada	FRESCO	2017-06-23	2017-07-13 10:02:00	2017-10-08 15:08:00	QUESO Fresco	Not Detected	No Isolation Made
17-08433	S23	Ensenada	PANELA	2017-06-23	2017-07-13 10:02:00	2017-10-08 15:08:00	QUESO Panela	Not Detected	No Isolation Made
17-08434	S66	Ensenada	FRESCO	2017-06-23	2017-07-13 10:02:00	2017-10-08 15:08:00	QUESO Fresco	Not Detected	No Isolation Made
17-08435	S57	Ensenada	FRESCO	2017-06-23	2017-07-13 10:02:00	2017-10-08 15:00:00	QUESO Fresco	Inhibited	No Isolation Made
17-08436	S83	Ensenada	FRESCO	2017-06-23	2017-07-13 10:02:00	2017-10-08 15:18:00	QUESO Fresco	Inhibited	No Isolation Made
17-08437	S30	Tecate	PANELA	2017-06-30	2017-07-13 10:02:00	2017-10-08 15:11:00	QUESO Panela	Not Detected	No Isolation Made
17-08438	S30	Tecate	FRESCO	2017-06-30	2017-07-13 10:02:00	2017-10-08 15:11:00	QUESO Fresco	Not Detected	No Isolation Made
17-08439	S28	Tijuana	FRESCO	2017-06-30	2017-07-13 10:02:00	2017-11-13 14:13:00	QUESO Fresco	Inhibited	No Isolation Made
17-08440	S28	Tijuana	PANELA	2017-06-30	2017-07-13 10:02:00	2017-10-08 15:11:00	QUESO Panela	Not Detected	No Isolation Made
17-08441	S26	Tijuana	FRESCO	2017-06-30	2017-07-13 10:02:00	2017-10-08 15:11:00	QUESO Fresco	Not Detected	No Isolation Made
17-08442	S26	Tijuana	FRESCO	2017-07-04	2017-07-13 10:02:00	2017-11-09 18:28:00	QUESO Fresco	Inhibited	Mycobacterium porcinum
17-08443	S70	Tijuana	FRESCO	2017-07-04	2017-07-13 10:02:00	2017-10-08 15:00:00	QUESO Fresco	Not Detected	No Isolation Made
17-08444	S52	Tijuana	PANELA	2017-07-04	2017-07-13 10:02:00	2017-10-08 15:00:00	QUESO Panela	Not Detected	No Isolation Made
17-08445	S79	Tijuana	FRESCO	2017-07-04	2017-07-13 10:02:00	2017-10-08 15:00:00	QUESO Fresco	Not Detected	No Isolation Made
17-08446	S79	Tijuana	PANELA	2017-07-04	2017-07-13 10:02:00	2017-10-08 15:11:00	QUESO Panela	Not Detected	No Isolation Made
17-11184	S19	Rosarito	PANELA	2017-07-20	2017-10-04 10:20:00	2017-12-21 19:23:00	QUESO Panela	Not Detected	No Isolation Made
17-11185	S19	Rosarito	FRESCO	2017-07-20	2017-10-04 10:20:00	2017-12-21 19:23:00	QUESO Fresco	Not Detected	No Isolation Made
17-11186	S17	Rosarito	FRESCO	2017-07-20	2017-10-04 10:20:00	2017-12-21 19:23:00	QUESO Fresco	Not Detected	No Isolation Made
17-11187	S25	Rosarito	FRESCO	2017-07-20	2017-10-04 10:20:00	2017-12-21 19:23:00	QUESO Fresco	Not Detected	No Isolation Made
17-11188	S25	Rosarito	PANELA	2017-07-20	2017-10-04 10:20:00	2017-12-21 19:23:00	QUESO Panela	Not Detected	No Isolation Made
17-11189	S10	Rosarito	FRESCO	2017-07-20	2017-10-04 10:20:00	2017-12-27 07:45:00	QUESO Fresco	Not Detected	Contaminated (overgrowth of non acid fast bacteria)
17-11190	S10	Rosarito	PANELA	2017-07-20	2017-10-04 10:20:00	2017-12-21 19:23:00	QUESO Panela	Not Detected	No Isolation Made
17-11191	S10	Rosarito	FRESCO	2017-07-20	2017-10-04 10:20:00	2017-12-21 19:23:00	QUESO Fresco	Not Detected	No Isolation Made
17-11192	S72	Rosarito	PANELA	2017-08-09	2017-10-04 10:20:00	2017-12-26 09:29:00	QUESO Panela	Inhibited	Mycobacterium porcinum
17-11193	S73	Rosarito	FRESCO	2017-08-09	2017-10-04 10:20:00	2017-12-26 09:29:00	QUESO Fresco	Inhibited	Mycobacterium porcinum
17-11194	S73	Rosarito	FRESCO	2017-08-09	2017-10-04 10:20:00	2017-12-21 19:44:00	QUESO Fresco	Detected	No Isolation Made
17-11195	S15	Rosarito	FRESCO	2017-08-09	2017-10-04 10:20:00	2017-12-21 19:44:00	QUESO Fresco	Not Detected	No Isolation Made
17-11196	S13	Rosarito	PANELA	2017-08-09	2017-10-04 10:20:00	2017-12-21 19:44:00	QUESO Panela	Detected	No Isolation Made
17-11197	S13	Rosarito	FRESCO	2017-08-09	2017-10-04 10:20:00	2017-12-21 19:44:00	QUESO Fresco	Not Detected	No Isolation Made
17-11198	S30	Tecate	FRESCO	2017-08-15	2017-10-04 10:20:00	2017-12-27 07:46:00	QUESO Fresco	Not Detected	No Isolation Made
17-11199	S30	Tecate	PANELA	2017-08-15	2017-10-04 10:20:00	2017-12-21 19:44:00	QUESO Panela	Detected	No Isolation Made
17-11200	S01	Tecate	PANELA	2017-08-15	2017-10-04 10:20:00	2017-12-27 07:47:00	QUESO Panela	Detected	Contaminated (overgrowth of non acid fast bacteria)
17-11201	S01	Tecate	FRESCO	2017-08-15	2017-10-04 10:20:00	2017-12-26 09:14:00	QUESO Fresco	Detected	No Isolation Made
17-11202	S06	Tecate	FRESCO	2017-08-15	2017-10-04 10:20:00	2017-12-27 07:47:00	QUESO Fresco	Not Detected	No Isolation Made
17-11203	S06	Tecate	PANELA	2017-08-15	2017-10-04 10:20:00	2017-12-21 19:44:00	QUESO Panela	Not Detected	No Isolation Made
17-11204	S28	Tijuana	FRESCO	2017-08-15	2017-10-04 10:20:00	2017-12-21 19:44:00	QUESO Fresco	Not Detected	No Isolation Made
17-11205	S28	Tijuana	PANELA	2017-08-15	2017-10-04 10:20:00	2017-12-26 09:29:00	QUESO Panela	Not Detected	Mycobacterium porcinum
17-11206	S02	Tijuana	FRESCO	2017-08-15	2017-10-04 10:20:00	2017-12-21 19:44:00	QUESO Fresco	Not Detected	No Isolation Made
17-11207	S26	Tijuana	FRESCO	2017-08-15	2017-10-04 10:20:00	2017-12-27 07:49:00	QUESO Fresco	Not Detected	Contaminated (overgrowth of non acid fast bacteria)
17-11208	S70	Tijuana	FRESCO	2017-08-15	2017-10-04 10:20:00	2017-12-21 19:44:00	QUESO Fresco	Not Detected	No Isolation Made
17-11209	S35	Ensenada	FRESCO	2017-08-25	2017-10-12 12:01:00	2017-12-21 19:44:00	QUESO Fresco	Not Detected	No Isolation Made
17-11210	S75	Ensenada	FRESCO	2017-08-25	2017-10-12 12:01:00	2017-12-21 19:44:00	QUESO Fresco	Not Detected	No Isolation Made
17-11211	S71	Ensenada	FRESCO	2017-08-25	2017-10-12 12:01:00	2017-12-21 19:45:00	QUESO Fresco	Not Detected	No Isolation Made
17-11212	S69	Ensenada	PANELA	2017-08-25	2017-10-12 12:01:00	2017-12-21 19:45:00	QUESO Panela	Not Detected	No Isolation Made
17-11213	S69	Ensenada	FRESCO	2017-08-25	2017-10-12 12:01:00	2017-12-21 19:45:00	QUESO Fresco	Not Detected	No Isolation Made
17-11235	S32	Ensenada	FRESCO	2017-08-25	2017-10-12 12:01:00	2017-12-21 19:45:00	QUESO Fresco	Not Detected	No Isolation Made
17-11236	S34	Ensenada	FRESCO	2017-08-25	2017-10-12 12:01:00	2017-12-21 19:45:00	QUESO Fresco	Not Detected	No Isolation Made
17-11237	S34	Ensenada	PANELA	2017-08-25	2017-10-12 12:01:00	2017-12-21 19:45:00	QUESO Panela	Not Detected	No Isolation Made
17-11238	S06	Tecate	PANELA	2017-09-08	2017-10-12 12:01:00	2017-12-21 19:45:00	QUESO Panela	Not Detected	No Isolation Made
17-11239	S06	Tecate	FRESCO	2017-09-08	2017-10-12 12:01:00	2017-12-21 19:45:00	QUESO Fresco	Not Detected	No Isolation Made
17-11240	S01	Tecate	FRESCO	2017-09-08	2017-10-12 12:01:00	2017-12-27 07:53:00	QUESO Fresco	Not Detected	Contaminated (overgrowth of non acid fast bacteria)
17-11241	S01	Tecate	PANELA	2017-09-08	2017-10-12 12:01:00	2017-12-21 19:45:00	QUESO Panela	Not Detected	No Isolation Made
17-11242	S74	Tecate	FRESCO	2017-09-08	2017-10-12 12:01:00	2017-12-21 19:45:00	QUESO Fresco	Not Detected	No Isolation Made
17-11243	S74	Tecate	PANELA	2017-09-08	2017-10-12 12:01:00	2017-12-21 19:45:00	QUESO Panela	Not Detected	No Isolation Made
17-11244	S03	Tecate	PANELA	2017-09-08	2017-10-12 12:01:00	2017-12-21 19:45:00	QUESO Panela	Not Detected	No Isolation Made
17-11245	S03	Tecate	FRESCO	2017-09-08	2017-10-12 12:01:00	2017-12-21 19:45:00	QUESO Fresco	Not Detected	No Isolation Made
17-11246	S23	Ensenada	FRESCO	2017-09-28	2017-10-12 12:01:00	2017-12-21 19:45:00	QUESO Fresco	Not Detected	No Isolation Made
17-11247	S23	Ensenada	PANELA	2017-09-28	2017-10-12 12:01:00	2017-12-27 07:54:00	QUESO Panela	Not Detected	No Isolation Made
17-11248	S61	Ensenada	FRESCO	2017-09-28	2017-10-12 12:01:00	2017-12-21 19:45:00	QUESO Fresco	Not Detected	No Isolation Made
17-11249	S65	Ensenada	FRESCO	2017-09-28	2017-10-12 12:01:00	2017-12-21 19:45:00	QUESO Fresco	Not Detected	No Isolation Made
17-11250	S64	Ensenada	FRESCO	2017-09-28	2017-10-12 12:01:00	2017-12-27 07:55:00	QUESO Fresco	Not Detected	No Isolation Made
17-11251	S64	Ensenada	PANELA	2017-09-28	2017-10-12 12:01:00	2017-12-27 07:55:00	QUESO Panela	Not Detected	No Isolation Made
17-11252	S63	Ensenada	FRESCO	2017-09-28	2017-10-12 12:01:00	2017-12-21 19:44:00	QUESO Fresco	Not Detected	No Isolation Made
17-11253	S60	Ensenada	FRESCO	2017-09-28	2017-10-12 12:01:00	2017-12-26 09:29:00	QUESO Fresco	Not Detected	Mycobacterium bolletii
17-11254	S67	Ensenada	FRESCO	2017-09-28	2017-10-12 12:01:00	2017-12-21 19:46:00	QUESO Fresco	Not Detected	No Isolation Made
17-11255	S62	Ensenada	FRESCO	2017-09-28	2017-10-12 12:01:00	2017-12-21 19:46:00	QUESO Fresco	Not Detected	No Isolation Made
17-11256	S69	Ensenada	PANELA	2017-09-29	2017-10-12 12:01:00	2017-12-27 07:55:00	QUESO Panela	Not Detected	No Isolation Made
17-11257	S69	Ensenada	FRESCO	2017-09-29	2017-10-12 12:01:00	2017-12-21 19:46:00	QUESO Fresco	Not Detected	No Isolation Made
17-11258	S46	Ensenada	FRESCO	2017-09-29	2017-10-12 12:01:00	2017-12-27 07:57:00	QUESO Fresco	Not Detected	Contaminated (overgrowth of non acid fast bacteria)
17-11259	S45	Tecate	PANELA	2017-09-29	2017-10-12 12:01:00	2017-12-21 19:45:00	QUESO Panela	Not Detected	No Isolation Made
17-11260	S45	Tecate	FRESCO	2017-09-29	2017-10-12 12:01:00	2017-12-27 07:57:00	QUESO Fresco	Not Detected	No Isolation Made
17-11261	S55	Tijuana	FRESCO	2017-09-29	2017-10-12 12:01:00	2017-12-21 19:45:00	QUESO Fresco	Not Detected	No Isolation Made
17-11262	S43	Tecate	FRESCO	2017-09-29	2017-10-12 12:01:00	2017-12-21 19:45:00	QUESO Fresco	Not Detected	No Isolation Made
17-11263	S54	Ensenada	FRESCO	2017-09-29	2017-10-12 12:01:00	2017-12-21 19:44:00	QUESO Fresco	Inhibited	No Isolation Made
17-11264	S53	Tecate	FRESCO	2017-09-29	2017-10-12 12:01:00	2017-12-21 19:44:00	QUESO Fresco	Inhibited	No Isolation Made
18-4940	S01	Tecate	FRESCO	2018-05-14	2018-05-16 15:07:00	2018-08-06 10:41:00	QUESO Fresco	Not Detected	No Isolation Made
18-4941	S01	Tecate	PANELA	2018-05-14	2018-05-16 15:07:00	2018-08-06 10:39:00	QUESO Panela	Not Detected	No Isolation Made
18-4942	S04	Tecate	FRESCO	2018-05-14	2018-05-16 15:07:00	2018-08-06 10:39:00	QUESO Fresco	Not Detected	No Isolation Made
18-4943	S04	Tecate	PANELA	2018-05-14	2018-05-16 15:07:00	2018-08-06 10:38:00	QUESO Panela	Not Detected	No Isolation Made
18-4944	S26	Tijuana	FRESCO	2018-05-14	2018-05-16 15:07:00	2018-08-06 10:36:00	QUESO Fresco	Not Detected	No Isolation Made
18-4945	S28	Tijuana	PANELA	2018-05-14	2018-05-16 15:07:00	2018-08-17 12:13:00	QUESO Panela	Detected	Mycobacterium bovis
18-4946	S28	Tijuana	FRESCO	2018-05-14	2018-05-16 15:07:00	2018-08-06 10:34:00	QUESO Fresco	Not Detected	No Isolation Made
18-4947	S80	Tijuana	FRESCO	2018-05-14	2018-05-16 15:07:00	2018-08-06 10:31:00	QUESO Fresco	Not Detected	No Isolation Made
18-4948	S80	Tijuana	PANELA	2018-05-14	2018-05-16 15:07:00	2018-08-29 17:46:00	QUESO Panela	Not Detected	Mycobacterium porcinum
18-5099	S46	Ensenada	FRESCO	2018-05-25	2018-06-13 11:02:00	2018-08-13 15:00:00	QUESO Fresco	Not Detected	No Isolation Made
18-5100	S34	Ensenada	FRESCO	2018-05-25	2018-06-13 11:02:00	2018-09-17 14:44:00	QUESO Fresco	Not Detected	Mycobacterium porcinum
18-5101	S34	Ensenada	PANELA	2018-05-25	2018-06-13 11:02:00	2018-08-13 15:00:00	QUESO Panela	Not Detected	No Isolation Made
18-5102	S32	Ensenada	FRESCO	2018-05-25	2018-05-30 13:56:00	2018-08-13 15:07:00	QUESO Fresco	Not Detected	No Isolation Made
18-5103	S45	Tecate	FRESCO	2018-05-25	2018-05-30 13:56:00	2018-08-13 15:07:00	QUESO Fresco	Inhibited	No Isolation Made
18-5104	S45	Tecate	PANELA	2018-05-25	2018-05-30 13:56:00	2018-08-13 15:07:00	QUESO Panela	Not Detected	No Isolation Made
18-5105	S39	Tecate	FRESCO	2018-05-25	2018-05-30 13:56:00	2018-08-13 15:07:00	QUESO Fresco	Not Detected	No Isolation Made
18-5106	S43	Tecate	FRESCO	2018-05-25	2018-05-30 13:56:00	2018-08-13 15:07:00	QUESO Fresco	Inhibited	No Isolation Made
18-5107	S43	Tecate	PANELA	2018-05-25	2018-05-30 13:56:00	2018-08-13 15:06:00	QUESO Panela	Inhibited	No Isolation Made
18-4949	S20	Tecate	PANELA	2018-06-18	2018-05-30 13:56:00	2018-08-20 13:10:00	QUESO Panela	Not Detected	No Isolation Made
18-4950	S20	Tecate	FRESCO	2018-06-18	2018-05-30 13:56:00	2018-08-13 15:06:00	QUESO Fresco	Not Detected	No Isolation Made
18-4951	S06	Tecate	FRESCO	2018-06-18	2018-05-30 13:56:00	2018-08-13 15:06:00	QUESO Fresco	Not Detected	No Isolation Made
18-5108	S06	Tecate	FRESCO	2018-06-18	2018-06-13 11:02:00	2018-08-13 15:00:00	QUESO Fresco	Inhibited	No Isolation Made
18-5109	S52	Tijuana	PANELA	2018-06-18	2018-06-13 11:02:00	2018-08-13 15:00:00	QUESO Panela	Not Detected	No Isolation Made
18-5110	S52	Tijuana	FRESCO	2018-06-18	2018-06-13 11:02:00	2018-08-13 15:00:00	QUESO Fresco	Not Detected	No Isolation Made
18-6574	S42	Ensenada	PANELA	2018-07-02	2018-07-05 09:56:00	2018-09-24 12:42:00	QUESO Panela	Not Detected	No Isolation Made
18-6575	S42	Ensenada	FRESCO	2018-07-02	2018-07-05 09:56:00	2018-09-24 12:42:00	QUESO Fresco	Detected	Contaminated (overgrowth of non acid fast bacteria)
18-6576	S41	Ensenada	PANELA	2018-07-02	2018-07-05 09:56:00	2018-09-24 12:41:00	QUESO Panela	Not Detected	Contaminated (overgrowth of non acid fast bacteria)
18-6577	S41	Ensenada	FRESCO	2018-07-02	2018-07-05 09:56:00	2018-09-24 12:41:00	QUESO Fresco	Not Detected	Contaminated (overgrowth of non acid fast bacteria)
18-6578	S57	Ensenada	FRESCO	2018-07-02	2018-07-05 09:56:00	2018-09-24 12:40:00	QUESO Fresco	Not Detected	No Isolation Made
18-6579	S29	Ensenada	FRESCO	2018-07-02	2018-07-05 09:56:00	2018-12-11 10:50:00	QUESO Fresco	Detected	Mycobacterium bovis
18-6580	S59	Ensenada	PANELA	2018-07-02	2018-07-05 09:56:00	2018-09-24 12:39:00	QUESO Panela	Not Detected	Contaminated (overgrowth of non acid fast bacteria)
18-6581	S59	Ensenada	PANELA	2018-07-02	2018-07-05 09:56:00	2018-09-24 12:39:00	QUESO Panela	Not Detected	Contaminated (overgrowth of non acid fast bacteria)
18-6582	S40	Ensenada	PANELA	2018-07-02	2018-07-05 09:56:00	2018-09-24 12:38:00	QUESO Panela	Not Detected	Contaminated (overgrowth of non acid fast bacteria)
18-6583	S40	Ensenada	FRESCO	2018-07-02	2018-07-05 09:56:00	2018-09-24 12:38:00	QUESO Fresco	Not Detected	No Isolation Made
18-6584	S58	Ensenada	FRESCO	2018-07-02	2018-07-05 09:56:00	2018-09-24 12:37:00	QUESO Fresco	Not Detected	No Isolation Made
18-6585	S23	Ensenada	PANELA	2018-07-02	2018-07-05 09:56:00	2018-09-24 12:37:00	QUESO Panela	Not Detected	No Isolation Made
18-6586	S23	Ensenada	FRESCO	2018-07-02	2018-07-05 09:56:00	2018-09-24 12:36:00	QUESO Fresco	Not Detected	No Isolation Made
18-6587	S64	Ensenada	PANELA	2018-07-02	2018-07-05 09:56:00	2018-09-24 12:36:00	QUESO Panela	Not Detected	No Isolation Made
18-6588	S64	Ensenada	FRESCO	2018-07-02	2018-07-05 09:56:00	2018-09-24 12:35:00	QUESO Fresco	Not Detected	No Isolation Made
18-6589	S67	Ensenada	PANELA	2018-07-02	2018-07-05 09:56:00	2018-09-24 12:35:00	QUESO Panela	Not Detected	No Isolation Made
18-6590	S67	Ensenada	FRESCO	2018-07-02	2018-07-05 09:56:00	2018-09-24 12:34:00	QUESO Fresco	Not Detected	No Isolation Made
18-7372	S85	Rosarito	FRESCO	2018-08-07	2018-08-08 16:32:00	2018-10-30 16:22:00	QUESO Fresco	Not Detected	No Isolation Made
18-7373	S85	Rosarito	PANELA	2018-08-07	2018-08-08 16:32:00	2018-11-19 16:11:00	QUESO Panela	Not Detected	Contaminated (overgrowth of non acid fast bacteria)
18-7374	S72	Rosarito	FRESCO	2018-08-07	2018-08-08 16:32:00	2018-11-30 10:03:00	QUESO Fresco	Not Detected	Mycobacterium porcinum
18-7375	S72	Rosarito	PANELA	2018-08-07	2018-08-08 16:32:00	2018-11-30 10:05:00	QUESO Panela	Not Detected	Mycobacterium porcinum
18-7376	S25	Rosarito	FRESCO	2018-08-07	2018-08-08 16:32:00	2018-10-15 09:54:00	QUESO Fresco	Not Detected	Contaminated (overgrowth of non acid fast bacteria)
18-7377	S25	Rosarito	PANELA	2018-08-07	2018-08-08 16:32:00	2018-10-18 16:36:00	QUESO Panela	Detected	No Isolation Made
18-7378	S82	Ensenada	FRESCO	2018-08-10	2018-08-15 11:59:00	2018-10-15 11:26:00	QUESO Fresco	Not Detected	Contaminated (overgrowth of non acid fast bacteria)
18-7379	S82	Ensenada	PANELA	2018-08-10	2018-08-15 11:59:00	2018-10-15 11:24:00	QUESO Panela	Not Detected	No Isolation Made
18-7380	S82	Ensenada	FRESCO	2018-08-10	2018-08-15 11:59:00	2018-10-15 11:23:00	QUESO Fresco	Not Detected	Contaminated (overgrowth of non acid fast bacteria)
18-7381	S82	Ensenada	PANELA	2018-08-10	2018-08-15 11:59:00	2018-10-15 10:59:00	QUESO Panela	Not Detected	No Isolation Made
18-7405	S35	Ensenada	PANELA	2018-08-10	2018-08-15 11:59:00	2018-10-15 10:59:00	QUESO Panela	Not Detected	No Isolation Made
18-7406	S35	Ensenada	FRESCO	2018-08-10	2018-08-15 11:59:00	2018-10-15 10:58:00	QUESO Fresco	Not Detected	No Isolation Made
18-7407	S75	Ensenada	FRESCO	2018-08-10	2018-08-15 11:59:00	2018-10-15 10:58:00	QUESO Fresco	Not Detected	No Isolation Made
18-7408	S75	Ensenada	PANELA	2018-08-10	2018-08-15 11:59:00	2018-10-15 10:57:00	QUESO Panela	Inhibited	No Isolation Made
18-7409	S16	Tijuana	FRESCO	2018-08-20	2018-08-22 15:05:00	2018-09-26 13:29:00	QUESO Fresco	Inhibited	Mycobacterium porcinum
18-7410	S16	Tijuana	PANELA	2018-08-20	2018-08-22 15:05:00	2018-10-17 16:05:00	QUESO Panela	Not Detected	No Isolation Made
18-7411	S14	Tijuana	FRESCO	2018-08-20	2018-08-22 15:05:00	2018-11-30 13:28:00	QUESO Fresco	Not Detected	No Isolation Made
18-7412	S14	Tijuana	PANELA	2018-08-20	2018-08-22 15:05:00	2018-10-15 10:51:00	QUESO Panela	Inhibited	No Isolation Made
18-7413	S14	Tijuana	FRESCO	2018-08-20	2018-08-22 15:05:00	2018-10-15 11:06:00	QUESO Fresco	Not Detected	No Isolation Made
18-7414	S14	Tijuana	PANELA	2018-08-20	2018-08-22 15:05:00	2018-10-15 10:51:00	QUESO Panela	Inhibited	No Isolation Made
18-7415	S14	Tijuana	FRESCO	2018-08-20	2018-08-22 15:05:00	2018-10-15 10:51:00	QUESO Fresco	Not Detected	No Isolation Made
18-7416	S14	Tijuana	PANELA	2018-08-20	2018-08-22 15:05:00	2018-10-15 10:51:00	QUESO Panela	Not Detected	No Isolation Made
18-8974	S29	Ensenada	FRESCO	2018-09-14	2018-09-26 10:43:00	2018-12-14 11:46:00	QUESO Fresco	Detected	Mycobacterium bovis
18-8975	S59	Ensenada	FRESCO	2018-09-14	2018-09-26 10:43:00	2018-12-17 15:05:00	QUESO Fresco	Not Detected	Atypical Mycobacterium species: Currently not identifiable using existing GenBank Sequences.
18-8976	S40	Ensenada	FRESCO	2018-09-14	2018-09-26 10:43:00	2018-12-10 10:21:00	QUESO Fresco	Not Detected	No Isolation Made
18-8977	S40	Ensenada	PANELA	2018-09-14	2018-09-26 10:43:00	2018-12-10 10:22:00	QUESO Panela	Not Detected	No Isolation Made
18-8978	S58	Ensenada	FRESCO	2018-09-14	2018-09-26 10:43:00	2018-12-10 10:24:00	QUESO Fresco	Not Detected	Contaminated (overgrowth of non acid fast bacteria)
18-8979	S23	Ensenada	FRESCO	2018-09-14	2018-09-26 10:43:00	2018-12-10 10:27:00	QUESO Fresco	Not Detected	Contaminated (overgrowth of non acid fast bacteria)
18-8980	S23	Ensenada	PANELA	2018-09-14	2018-09-26 10:43:00	2018-12-10 10:31:00	QUESO Panela	Not Detected	No Isolation Made
18-8981	S64	Ensenada	FRESCO	2018-09-14	2018-09-26 10:43:00	2018-12-10 10:33:00	QUESO Fresco	Not Detected	No Isolation Made
18-9080	S64	Ensenada	PANELA	2018-09-14	2018-09-26 10:43:00	2018-12-27 10:38:00	QUESO Panela	Not Detected	No Isolation Made
18-9081	S67	Ensenada	FRESCO	2018-09-14	2018-09-26 10:43:00	2018-12-17 14:50:00	QUESO Fresco	Not Detected	No Isolation Made
18-9082	S67	Ensenada	PANELA	2018-09-14	2018-09-26 10:43:00	2018-12-17 14:49:00	QUESO Panela	Not Detected	No Isolation Made
18-9083	S62	Ensenada	FRESCO	2018-09-14	2018-09-26 10:43:00	2018-12-17 14:48:00	QUESO Fresco	Inhibited	No Isolation Made
18-9084	S62	Ensenada	PANELA	2018-09-14	2018-09-26 10:43:00	2018-12-17 14:47:00	QUESO Panela	Not Detected	No Isolation Made
18-9085	S82	Ensenada	FRESCO	2018-09-14	2018-09-26 10:43:00	2018-12-17 14:45:00	QUESO Fresco	Not Detected	Atypical Mycobacterium species: Currently not identifiable using existing GenBank Sequences.
18-9086	S82	Ensenada	FRESCO	2018-09-14	2018-09-26 10:43:00	2019-01-31 15:22:00	QUESO Fresco	Not Detected	No Isolation Made
18-9087	S82	Ensenada	FRESCO	2018-09-14	2018-09-26 10:43:00	2018-12-17 10:40:00	QUESO Fresco	Not Detected	No Isolation Made
18-9088	S82	Ensenada	PANELA	2018-09-14	2018-09-26 10:43:00	2018-12-17 10:40:00	QUESO Panela	Not Detected	No Isolation Made
19-4693	S35	Ensenada	FRESCO	2019-05-04	2019-05-08 10:36:00	2019-08-02 15:37:00	QUESO Fresco	Not Detected	No Isolation Made
19-4694	S35	Ensenada	PANELA	2019-05-04	2019-05-08 10:36:00	2019-08-02 15:39:00	QUESO Panela	Not Detected	No Isolation Made
19-4695	S07	Ensenada	PANELA	2019-05-04	2019-05-08 10:36:00	2019-08-02 15:45:00	QUESO Panela	Not Detected	No Isolation Made
19-4696	S07	Ensenada	FRESCO	2019-05-04	2019-05-08 10:36:00	2019-08-02 15:44:00	QUESO Fresco	Not Detected	No Isolation Made
19-4697	S07	Ensenada	PANELA	2019-05-04	2019-05-08 10:36:00	2019-08-02 15:45:00	QUESO Panela	Not Detected	No Isolation Made
19-4698	S07	Ensenada	FRESCO	2019-05-04	2019-05-08 10:36:00	2019-08-02 15:49:00	QUESO Fresco	Not Detected	No Isolation Made
19-4699	S32	Ensenada	FRESCO	2019-05-04	2019-05-08 10:36:00	2019-08-02 15:49:00	QUESO Fresco	Not Detected	No Isolation Made
19-4700	S33	Ensenada	PANELA	2019-05-04	2019-05-08 10:36:00	2019-08-02 15:49:00	QUESO Panela	Not Detected	No Isolation Made
19-4701	S33	Ensenada	FRESCO	2019-05-04	2019-05-08 10:36:00	2019-08-02 15:50:00	QUESO Fresco	Not Detected	No Isolation Made
19-4702	S33	Ensenada	FRESCO	2019-05-04	2019-05-08 10:36:00	2019-08-02 15:51:00	QUESO Fresco	Not Detected	No Isolation Made
19-4703	S31	Tecate	PANELA	2019-05-06	2019-05-08 10:36:00	2019-08-02 15:51:00	QUESO Panela	Not Detected	No Isolation Made
19-4704	S31	Tecate	FRESCO	2019-05-06	2019-05-08 10:36:00	2019-07-19 16:02:00	QUESO Fresco	Not Detected	Mycobacterium neoaurum
19-4725	S06	Tecate	PANELA	2019-05-06	2019-05-08 10:36:00	2019-09-05 11:31:00	QUESO Panela	Not Detected	No Isolation Made
19-4726	S06	Tecate	FRESCO	2019-05-06	2019-05-08 10:36:00	2019-08-02 16:09:00	QUESO Fresco	Not Detected	No Isolation Made
19-4727	S01	Tecate	PANELA	2019-05-06	2019-05-08 10:36:00	2019-08-02 16:10:00	QUESO Panela	Not Detected	No Isolation Made
19-4728	S01	Tecate	FRESCO	2019-05-06	2019-05-08 10:36:00	2019-08-19 10:57:00	QUESO Fresco	Not Detected	Contaminated (overgrowth of non acid fast bacteria)
19-4729	S05	Tecate	PANELA	2019-05-06	2019-05-08 10:36:00	2019-08-02 16:14:00	QUESO Panela	Not Detected	No Isolation Made
19-4730	S05	Tecate	FRESCO	2019-05-06	2019-05-08 10:36:00	2019-08-02 16:15:00	QUESO Fresco	Not Detected	No Isolation Made
19-4731	S72	Rosarito	PANELA	2019-05-19	2019-05-22 10:50:00	2019-06-21 17:45:00	QUESO Panela	Not Detected	Mycobacterium porcinum
19-4732	S72	Rosarito	FRESCO	2019-05-19	2019-05-22 10:50:00	2019-06-21 17:48:00	QUESO Fresco	Not Detected	Mycobacterium porcinum
19-4733	S15	Rosarito	PANELA	2019-05-19	2019-05-22 10:50:00	2019-07-05 14:53:00	QUESO Panela	Detected	Mycobacterium bovis
19-4734	S15	Rosarito	FRESCO	2019-05-19	2019-05-22 10:50:00	2019-07-19 11:01:00	QUESO Fresco	Detected	No Isolation Made
19-4735	S17	Rosarito	FRESCO	2019-05-19	2019-05-22 10:50:00	2019-07-16 10:40:00	QUESO Fresco	Not Detected	No Isolation Made
19-4736	S18	Rosarito	FRESCO	2019-05-19	2019-05-22 10:50:00	2019-08-02 15:31:00	QUESO Fresco	Detected	Mycobacterium bovis
19-4737	S25	Rosarito	PANELA	2019-05-19	2019-05-22 10:50:00	2019-07-16 11:00:00	QUESO Panela	Not Detected	No Isolation Made
19-4738	S25	Rosarito	FRESCO	2019-05-19	2019-05-22 10:50:00	2019-07-16 11:00:00	QUESO Fresco	Not Detected	No Isolation Made
19-4739	S48	Rosarito	FRESCO	2019-05-19	2019-05-22 10:50:00	2019-07-16 11:00:00	QUESO Fresco	Not Detected	No Isolation Made
19-4841	S03	Tecate	PANELA	2019-05-19	2019-05-22 10:50:00	2019-08-02 15:14:00	QUESO Panela	Not Detected	No Isolation Made
19-4842	S03	Tecate	FRESCO	2019-05-19	2019-05-22 10:50:00	2019-08-02 15:16:00	QUESO Fresco	Inhibited	No Isolation Made
19-4843	S08	Tecate	PANELA	2019-05-19	2019-05-22 10:50:00	2019-08-02 15:18:00	QUESO Panela	Inhibited	No Isolation Made
19-4844	S08	Tecate	FRESCO	2019-05-19	2019-05-22 10:50:00	2019-08-02 15:20:00	QUESO Fresco	Inhibited	No Isolation Made
19-4845	S77	Tecate	PANELA	2019-05-19	2019-05-22 10:50:00	2019-07-19 11:25:00	QUESO Panela	Not Detected	Contaminated (overgrowth of non acid fast bacteria)
19-4846	S77	Tecate	FRESCO	2019-05-19	2019-05-22 10:50:00	2019-08-02 15:23:00	QUESO Fresco	Inhibited	No Isolation Made
19-4945	S82	Ensenada	PANELA	2019-05-28	2019-05-29 11:14:00	2019-09-07 11:33:00	QUESO Panela	Not Detected	No Isolation Made
19-4946	S82	Ensenada	FRESCO	2019-05-28	2019-05-29 11:14:00	2019-07-22 13:07:00	QUESO Fresco	Not Detected	No Isolation Made
19-4947	S82	Ensenada	PANELA	2019-05-28	2019-05-29 11:14:00	2019-07-22 13:07:00	QUESO Panela	Not Detected	No Isolation Made
19-4948	S82	Ensenada	FRESCO	2019-05-28	2019-05-29 11:14:00	2019-07-19 16:14:00	QUESO Fresco	Not Detected	Mycobacterium fortuitum
19-4949	S82	Ensenada	PANELA	2019-05-28	2019-05-29 11:14:00	2019-07-22 13:07:00	QUESO Panela	Not Detected	No Isolation Made
19-4950	S82	Ensenada	FRESCO	2019-05-28	2019-05-29 11:14:00	2019-07-22 13:07:00	QUESO Fresco	Not Detected	No Isolation Made
19-4951	S26	Tijuana	FRESCO	2019-05-28	2019-05-29 11:14:00	2019-07-22 13:07:00	QUESO Fresco	Detected	No Isolation Made
19-4952	S36	Tijuana	PANELA	2019-05-28	2019-05-29 11:14:00	2019-07-22 13:07:00	QUESO Panela	Not Detected	No Isolation Made
19-4953	S36	Tijuana	FRESCO	2019-05-28	2019-05-29 11:14:00	2019-07-22 13:07:00	QUESO Fresco	Not Detected	No Isolation Made
19-4954	S28	Tijuana	PANELA	2019-05-28	2019-05-29 11:14:00	2019-07-22 13:07:00	QUESO Panela	Not Detected	No Isolation Made
19-4955	S28	Tijuana	FRESCO	2019-05-28	2019-05-29 11:14:00	2019-07-19 16:07:00	QUESO Fresco	Not Detected	Mycobacterium porcinum
19-4956	S27	Tijuana	PANELA	2019-05-28	2019-05-29 11:14:00	2019-09-07 11:35:00	QUESO Panela	Not Detected	No Isolation Made
19-4957	S27	Tijuana	FRESCO	2019-05-28	2019-05-29 11:14:00	2019-07-23 16:44:00	QUESO Fresco	Not Detected	No Isolation Made
19-4958	S52	Tijuana	PANELA	2019-05-28	2019-05-29 11:14:00	2019-07-22 13:06:00	QUESO Panela	Not Detected	Contaminated (overgrowth of non acid fast bacteria)
19-4959	S52	Tijuana	FRESCO	2019-05-28	2019-05-29 11:14:00	2019-07-22 13:07:00	QUESO Fresco	Not Detected	No Isolation Made
19-5332	S41	Ensenada	PANELA	2019-06-10	2019-06-12 10:21:00	2019-08-08 13:32:00	QUESO Panela	Not Detected	No Isolation Made
19-5333	S41	Ensenada	PANELA	2019-06-10	2019-06-12 10:21:00	2019-09-09 14:51:00	QUESO Panela	Not Detected	No Isolation Made
19-5334	S41	Ensenada	FRESCO	2019-06-10	2019-06-12 10:21:00	2019-09-09 14:52:00	QUESO Fresco	Not Detected	Contaminated (overgrowth of non acid fast bacteria)
19-5335	S29	Ensenada	FRESCO	2019-06-10	2019-06-12 10:21:00	2019-10-22 17:12:00	QUESO Fresco	Detected	Mycobacterium bovis
19-5336	S59	Ensenada	FRESCO	2019-06-10	2019-06-12 10:21:00	2019-09-09 14:54:00	QUESO Fresco	Not Detected	No Isolation Made
19-5337	S58	Ensenada	FRESCO	2019-06-10	2019-06-12 10:21:00	2019-09-09 14:55:00	QUESO Fresco	Not Detected	No Isolation Made
19-5338	S23	Ensenada	PANELA	2019-06-10	2019-06-12 10:21:00	2019-09-09 14:56:00	QUESO Panela	Inhibited	No Isolation Made
19-5339	S23	Ensenada	FRESCO	2019-06-10	2019-06-12 10:21:00	2019-09-07 11:40:00	QUESO Fresco	Not Detected	No Isolation Made
19-5359	S67	Ensenada	FRESCO	2019-06-10	2019-06-12 10:21:00	2019-08-08 13:39:00	QUESO Fresco	Not Detected	No Isolation Made
19-5360	S57	Ensenada	FRESCO	2019-06-10	2019-06-12 10:21:00	2019-08-08 13:40:00	QUESO Fresco	Not Detected	No Isolation Made
19-5361	S56	Ensenada	PANELA	2019-06-10	2019-06-12 10:21:00	2019-08-08 13:41:00	QUESO Panela	Not Detected	No Isolation Made
19-5362	S56	Ensenada	FRESCO	2019-06-10	2019-06-12 10:21:00	2019-08-08 13:41:00	QUESO Fresco	Not Detected	No Isolation Made
19-5363	S83	Ensenada	PANELA	2019-06-10	2019-06-12 10:21:00	2019-08-08 13:42:00	QUESO Panela	Not Detected	No Isolation Made
19-5364	S83	Ensenada	PANELA	2019-06-10	2019-06-12 10:21:00	2019-08-08 13:43:00	QUESO Panela	Not Detected	No Isolation Made
19-5365	S83	Ensenada	FRESCO	2019-06-10	2019-06-12 10:21:00	2019-08-08 13:44:00	QUESO Fresco	Not Detected	No Isolation Made
19-5366	S83	Ensenada	FRESCO	2019-06-10	2019-06-12 10:21:00	2019-08-08 13:44:00	QUESO Fresco	Not Detected	No Isolation Made
19-5367	S83	Ensenada	FRESCO	2019-06-10	2019-06-12 10:21:00	2019-08-08 13:45:00	QUESO Fresco	Not Detected	No Isolation Made
19-5698	S69	Ensenada	PANELA	2019-06-24	2019-06-26 10:11:00	2019-08-20 14:44:00	QUESO Panela	Inhibited	No Isolation Made
19-5699	S69	Ensenada	PANELA	2019-06-24	2019-06-26 10:11:00	2019-08-20 14:45:00	QUESO Panela	Not Detected	No Isolation Made
19-5700	S69	Ensenada	FRESCO	2019-06-24	2019-06-26 10:11:00	2019-08-20 14:45:00	QUESO Fresco	Not Detected	No Isolation Made
19-5701	S69	Ensenada	FRESCO	2019-06-24	2019-06-26 10:11:00	2019-08-20 14:47:00	QUESO Fresco	Inhibited	No Isolation Made
19-5702	S44	Tecate	PANELA	2019-06-24	2019-06-26 10:11:00	2019-08-20 14:47:00	QUESO Panela	Inhibited	No Isolation Made
19-5703	S44	Tecate	FRESCO	2019-06-24	2019-06-26 10:11:00	2019-08-20 14:47:00	QUESO Fresco	Inhibited	No Isolation Made
19-5704	S39	Tecate	FRESCO	2019-06-24	2019-06-26 10:11:00	2019-08-20 14:47:00	QUESO Fresco	Inhibited	No Isolation Made
19-5705	S33	Ensenada	PANELA	2019-06-24	2019-06-26 10:11:00	2019-08-20 14:47:00	QUESO Panela	Inhibited	No Isolation Made
19-5706	S33	Ensenada	FRESCO	2019-06-24	2019-06-26 10:11:00	2019-08-20 14:47:00	QUESO Fresco	Inhibited	No Isolation Made
19-5707	S33	Ensenada	FRESCO	2019-06-24	2019-06-26 10:11:00	2019-08-20 14:47:00	QUESO Fresco	Inhibited	No Isolation Made
19-5708	S51	Tecate	PANELA	2019-06-24	2019-06-26 10:11:00	2019-08-20 14:47:00	QUESO Panela	Inhibited	No Isolation Made
19-5709	S51	Tecate	FRESCO	2019-06-24	2019-06-26 10:11:00	2019-08-20 14:47:00	QUESO Fresco	Inhibited	No Isolation Made
19-5710	S37	Tecate	PANELA	2019-06-24	2019-06-26 10:11:00	2019-08-20 14:47:00	QUESO Panela	Inhibited	No Isolation Made
19-5711	S37	Tecate	PANELA	2019-06-24	2019-06-26 10:11:00	2019-08-20 14:47:00	QUESO Panela	Inhibited	No Isolation Made
19-5712	S37	Tecate	FRESCO	2019-06-24	2019-06-26 10:11:00	2019-08-20 14:47:00	QUESO Fresco	Inhibited	No Isolation Made
19-5901	S21	Tecate	PANELA	2019-07-02	2019-07-05 09:56:00	2019-09-03 14:08:00	QUESO Panela	Inhibited	No Isolation Made
19-5902	S31	Tecate	PANELA	2019-07-02	2019-07-05 09:56:00	2019-09-03 14:08:00	QUESO Panela	Inhibited	No Isolation Made
19-5903	S31	Tecate	FRESCO	2019-07-02	2019-07-05 09:56:00	2019-09-03 14:08:00	QUESO Fresco	Inhibited	No Isolation Made
19-5904	S03	Tecate	PANELA	2019-07-02	2019-07-05 09:56:00	2019-09-03 14:08:00	QUESO Panela	Inhibited	No Isolation Made
19-5905	S03	Tecate	FRESCO	2019-07-02	2019-07-05 09:56:00	2019-09-03 14:08:00	QUESO Fresco	Inhibited	No Isolation Made
19-5906	S01	Tecate	PANELA	2019-07-02	2019-07-05 09:56:00	2019-09-03 14:08:00	QUESO Panela	Not Detected	No Isolation Made
19-5907	S01	Tecate	FRESCO	2019-07-02	2019-07-05 09:56:00	2019-09-03 14:08:00	QUESO Fresco	Inhibited	No Isolation Made
19-5908	S06	Tecate	FRESCO	2019-07-02	2019-07-05 09:56:00	2019-09-03 14:08:00	QUESO Fresco	Inhibited	No Isolation Made
19-5909	S08	Tecate	PANELA	2019-07-02	2019-07-05 09:56:00	2019-09-03 14:08:00	QUESO Panela	Inhibited	No Isolation Made
19-5910	S08	Tecate	FRESCO	2019-07-02	2019-07-05 09:56:00	2019-09-03 14:08:00	QUESO Fresco	Inhibited	No Isolation Made
19-5911	S05	Tecate	PANELA	2019-07-02	2019-07-05 09:56:00	2019-09-03 14:08:00	QUESO Panela	Not Detected	No Isolation Made
19-5912	S05	Tecate	PANELA	2019-07-02	2019-07-05 09:56:00	2019-09-03 14:08:00	QUESO Panela	Inhibited	No Isolation Made
19-5913	S05	Tecate	FRESCO	2019-07-02	2019-07-05 09:56:00	2019-09-03 14:08:00	QUESO Fresco	Inhibited	No Isolation Made
19-5914	S77	Tecate	PANELA	2019-07-02	2019-07-05 09:56:00	2019-09-03 14:08:00	QUESO Panela	Not Detected	No Isolation Made
19-5915	S77	Tecate	FRESCO	2019-07-02	2019-07-05 09:56:00	2019-09-03 14:08:00	QUESO Fresco	Inhibited	No Isolation Made
19-6002	S76	Tijuana	FRESCO	2019-07-08	2019-07-10 10:20:00	2019-09-03 14:54:00	QUESO Fresco	Inhibited	No Isolation Made
19-6003	S11	Tijuana	FRESCO	2019-07-08	2019-07-10 10:20:00	2019-09-03 14:54:00	QUESO Fresco	Not Detected	No Isolation Made
19-6004	S49	Rosarito	PANELA	2019-07-08	2019-07-10 10:20:00	2019-09-03 14:54:00	QUESO Panela	Inhibited	No Isolation Made
19-6005	S49	Rosarito	FRESCO	2019-07-08	2019-07-10 10:20:00	2019-09-03 14:54:00	QUESO Fresco	Inhibited	No Isolation Made
19-6006	S09	Rosarito	PANELA	2019-07-08	2019-07-10 10:20:00	2019-09-13 12:09:00	QUESO Panela	Not Detected	Mycobacterium porcinum
19-6007	S09	Rosarito	FRESCO	2019-07-08	2019-07-10 10:20:00	2019-09-25 13:02:00	QUESO Fresco	Inhibited	Mycobacterium porcinum
19-6008	S72	Rosarito	PANELA	2019-07-08	2019-07-10 10:20:00	2019-09-13 12:12:00	QUESO Panela	Inhibited	Mycobacterium porcinum
19-6009	S72	Rosarito	FRESCO	2019-07-08	2019-07-10 10:20:00	2019-09-13 12:16:00	QUESO Fresco	Inhibited	Mycobacterium porcinum
19-6010	S22	Rosarito	PANELA	2019-07-08	2019-07-10 10:20:00	2019-09-03 14:54:00	QUESO Panela	Inhibited	No Isolation Made
19-6011	S22	Rosarito	FRESCO	2019-07-08	2019-07-10 10:20:00	2019-09-03 14:54:00	QUESO Fresco	Inhibited	No Isolation Made
19-6012	S38	Rosarito	PANELA	2019-07-08	2019-07-10 10:20:00	2019-09-03 14:54:00	QUESO Panela	Detected	No Isolation Made
19-6013	S38	Rosarito	FRESCO	2019-07-08	2019-07-10 10:20:00	2019-09-03 14:54:00	QUESO Fresco	Inhibited	No Isolation Made
19-6014	S38	Rosarito	PANELA	2019-07-08	2019-07-10 10:20:00	2019-09-03 14:54:00	QUESO Panela	Inhibited	No Isolation Made
19-6015	S38	Rosarito	FRESCO	2019-07-08	2019-07-10 10:20:00	2019-09-09 14:58:00	QUESO Fresco	Inhibited	No Isolation Made
19-6333	S78	Rosarito	FRESCO	2019-07-15	2019-07-18 09:44:00	2019-09-09 15:00:00	QUESO Fresco	Inhibited	Mycobacterium porcinum
19-6334	S24	Rosarito	PANELA	2019-07-15	2019-07-18 09:44:00	2019-09-09 15:19:00	QUESO Panela	Not Detected	No Isolation Made
19-6335	S24	Rosarito	FRESCO	2019-07-15	2019-07-18 09:44:00	2019-09-09 15:20:00	QUESO Fresco	Not Detected	No Isolation Made
19-6336	S24	Rosarito	PANELA	2019-07-15	2019-07-18 09:44:00	2019-09-09 15:22:00	QUESO Panela	Inhibited	No Isolation Made
19-6337	S24	Rosarito	FRESCO	2019-07-15	2019-07-18 09:44:00	2019-09-09 15:22:00	QUESO Fresco	Not Detected	No Isolation Made
19-6338	S47	Rosarito	PANELA	2019-07-15	2019-07-18 09:44:00	2019-09-09 15:22:00	QUESO Panela	Not Detected	No Isolation Made
19-6339	S47	Rosarito	FRESCO	2019-07-15	2019-07-18 09:44:00	2019-09-09 15:23:00	QUESO Fresco	Inhibited	No Isolation Made
19-6340	S12	Tijuana	FRESCO	2019-07-15	2019-07-18 09:44:00	2019-09-12 09:18:00	QUESO Fresco	Not Detected	No Isolation Made
19-6341	S84	Tijuana	PANELA	2019-07-15	2019-07-18 09:44:00	2019-09-09 15:25:00	QUESO Panela	Inhibited	No Isolation Made
19-6342	S84	Tijuana	FRESCO	2019-07-15	2019-07-18 09:44:00	2019-09-09 15:25:00	QUESO Fresco	Not Detected	No Isolation Made
19-6343	S81	Tecate	PANELA	2019-07-15	2019-07-18 09:44:00	2019-09-09 15:26:00	QUESO Panela	Not Detected	No Isolation Made
19-6344	S81	Tecate	FRESCO	2019-07-15	2019-07-18 09:44:00	2019-09-12 09:18:00	QUESO Fresco	Not Detected	No Isolation Made
19-6345	S50	Tecate	PANELA	2019-07-15	2019-07-18 09:44:00	2019-09-12 09:18:00	QUESO Panela	Not Detected	No Isolation Made
19-6346	S50	Tecate	FRESCO	2019-07-15	2019-07-18 09:44:00	2019-09-12 09:18:00	QUESO Fresco	Not Detected	No Isolation Made
19-8046	S21	Tecate	PANELA	2019-09-02	2019-09-05 10:51:00	2019-11-08 11:43:00	QUESO Panela	Not Detected	No Isolation Made
19-8047	S31	Tecate	PANELA	2019-09-02	2019-09-05 10:51:00	2019-11-08 11:43:00	QUESO Panela	Not Detected	No Isolation Made
19-8048	S31	Tecate	FRESCO	2019-09-02	2019-09-05 10:51:00	2019-11-08 11:43:00	QUESO Fresco	Not Detected	No Isolation Made
19-8049	S03	Tecate	PANELA	2019-09-02	2019-09-05 10:51:00	2019-11-08 11:43:00	QUESO Panela	Not Detected	No Isolation Made
19-8050	S03	Tecate	FRESCO	2019-09-02	2019-09-05 10:51:00	2019-11-08 11:43:00	QUESO Fresco	Not Detected	No Isolation Made
19-8051	S01	Tecate	PANELA	2019-09-02	2019-09-05 10:51:00	2019-11-08 11:43:00	QUESO Panela	Not Detected	No Isolation Made
19-8052	S01	Tecate	FRESCO	2019-09-02	2019-09-05 10:51:00	2019-11-08 11:43:00	QUESO Fresco	Not Detected	No Isolation Made
19-8053	S06	Tecate	PANELA	2019-09-02	2019-09-05 10:51:00	2019-11-08 11:43:00	QUESO Panela	Not Detected	No Isolation Made
19-8054	S06	Tecate	FRESCO	2019-09-02	2019-09-05 10:51:00	2019-11-08 11:43:00	QUESO Fresco	Not Detected	No Isolation Made
19-8055	S05	Tecate	PANELA	2019-09-02	2019-09-05 10:51:00	2019-11-08 11:43:00	QUESO Panela	Not Detected	No Isolation Made
19-8056	S05	Tecate	FRESCO	2019-09-02	2019-09-05 10:51:00	2019-11-08 11:43:00	QUESO Fresco	Not Detected	No Isolation Made
19-8057	S03	Tecate	PANELA	2019-09-02	2019-09-05 10:51:00	2019-11-08 11:43:00	QUESO Panela	Not Detected	No Isolation Made
19-8058	S03	Tecate	FRESCO	2019-09-02	2019-09-05 10:51:00	2019-11-08 11:43:00	QUESO Fresco	Not Detected	No Isolation Made
19-8059	S27	Tijuana	PANELA	2019-09-02	2019-09-05 10:51:00	2019-11-08 11:43:00	QUESO Panela	Not Detected	No Isolation Made
19-8060	S27	Tijuana	FRESCO	2019-09-02	2019-09-05 10:51:00	2019-11-08 11:43:00	QUESO Fresco	Not Detected	No Isolation Made
19-8061	S28	Tijuana	PANELA	2019-09-02	2019-09-05 10:51:00	2019-12-03 12:29:00	QUESO Panela	Detected	Mycobacterium bovis
19-8062	S28	Tijuana	FRESCO	2019-09-02	2019-09-05 10:51:00	2019-11-08 11:43:00	QUESO Fresco	Detected	No Isolation Made
